# Supplementary material for: A fluorescence biosensor for Salmonella typhimurium detection in food based on the nano-self-assembly of alendronic acid modified upconversion and gold nanoparticles
Source: Royal Society of Chemistry journal article supplement (doi:10.1039/d1ay00493j), 2021-01-01
Supplement: d1ay00493j1.pdf [file d1ay00493j1.pdf]

**Fluorescence biosensor for *Salmonella typhimurium* detection in food  
based on nano-self-assembly of alendronic acid modified  
upconversion and gold nanoparticles**

Min Chen, Leiqing Pan, Kang Tu\*

College of Food Science and Technology, Nanjing Agricultural University, Nanjing  
210095, People's Republic of China

Table 1S The comparison with other methods for selectivity of

Salmonella typhimurium

| Methods                   | Salmonella typhimurium(target) | Other food-borne pathogens (non tagert) | Times (non tagert/target) | Reference |
|---------------------------|--------------------------------|-----------------------------------------|---------------------------|-----------|
| Fluorescence probe        | 10 <sup>3</sup> CFU/mL         | 10 <sup>3</sup> CFU/mL                  | 1                         | [1]       |
| Impedimetric immunosensor | 10 <sup>4</sup> CFU/mL         | 10 <sup>5</sup> CFU/mL                  | 10                        | [2]       |
| ELISA                     | 10 <sup>6</sup> CFU/mL         | 10 <sup>6</sup> CFU/mL                  | 1                         | [3]       |
| Our method                | 10 <sup>4</sup> CFU/mL         | 10 <sup>6</sup> CFU/mL                  | 100                       |           |

**References**

[1] R. wang, Y. Xu, T. Zhang, Y. Jiang, Rapid and sensitive detection of Salmonella typhimurium using aptamer-conjugated carbon dots as fluorescence probe, Anal Methods, 2015,7,1701-1706.

[2] M. Ruchi, J. Monu, P. Preeti, S .Arunima, S. D.K, S. Raman, Novel surface antigen based impedimetric immunosensor for detection of Salmonella typhimurium in water and juice samples, Biosens Bioelectron, 2016, 85, 707-713.

[3] W. Wang, L. Liu, S. Song, L. Tang, H. Kuang C. Xu, A highly sensitive ELISA and immunochromatographic strip for the detection of Salmonella typhimurium in milk samples, Sensors, 2015, 15(3), 5281-5292.
